# Supplementary material
Source: publisher site journal article supplement (https://www.dovepress.com/article/374889)
Supplement: Supplementary file 1 [file get_supplementary_file.php]

Supplementary files

**Table1.** Exploratory factor analysis of the intention to engage in self-protective behaviors

| Variable | Factor 1 | Factor 2 | Uniqueness |
| --- | --- | --- | --- |
| disinfect daily | 0.7528 | -0.3643 | 0.3006 |
| wear masks | 0.6633 | 0.4904 | 0.5803 |
| wear gloves or goggles | 0.6866 | 0.0433 | 0.5268 |
| wash hands more frequently | 0.6610 | -0.3903 | 0.3443 |

**Figure2**:Scree plot of eigenvalues after factor analysis

**Table 2:** Regression models of self-protective behaviors

|  | Model 1 | Model 2 | Model 3 | Model 4 | Model 5 | Model 6 |
| --- | --- | --- | --- | --- | --- | --- |
| Age | 0.0183 | 0.0198 | 0.0192 | 0.0185 | 0.0210 | 0.0196 |
|  | (0.0203) | (0.0203) | (0.0203) | (0.0203) | (0.0203) | (0.0203) |
| Age2 | -0.000364 | -0.000379 | -0.000376 | -0.000360 | -0.000394 | -0.000376 |
|  | (0.000274) | (0.000274) | (0.000274) | (0.000274) | (0.000274) | (0.000274) |
| Sex(Male=0) |  |  |  |  |  |  |
| Female | 0.198*** | 0.194*** | 0.194*** | 0.194*** | 0.191*** | 0.193*** |
|  | (0.0487) | (0.0494) | (0.0494) | (0.0494) | (0.0494) | (0.0495) |
| Education level(Primary school=0) |  |  |  |  |  |  |
| Junior school | 2.641*** | 2.641*** | 2.665*** | 2.629*** | 2.627*** | 2.637*** |
|  | (0.528) | (0.527) | (0.527) | (0.527) | (0.527) | (0.527) |
| Senior school | 2.327*** | 2.300*** | 2.303*** | 2.300*** | 2.269*** | 2.296*** |
|  | (0.512) | (0.511) | (0.511) | (0.511) | (0.511) | (0.511) |
| College | 2.289*** | 2.232*** | 2.239*** | 2.237*** | 2.211*** | 2.229*** |
|  | (0.505) | (0.505) | (0.505) | (0.505) | (0.505) | (0.505) |
| Post graduate | 2.280*** | 2.210*** | 2.219*** | 2.215*** | 2.187*** | 2.209*** |
|  | (0.507) | (0.507) | (0.507) | (0.507) | (0.507) | (0.507) |
| Marital status(single=0) |  |  |  |  |  |  |
| Married | -0.151** | -0.146** | -0.146** | -0.148** | -0.146** | -0.145** |
|  | (0.0725) | (0.0725) | (0.0725) | (0.0724) | (0.0725) | (0.0725) |
| Divorsed | 0.188* | 0.182* | 0.191** | 0.186* | 0.181* | 0.179* |
|  | (0.0963) | (0.0964) | (0.0966) | (0.0963) | (0.0963) | (0.0964) |
| Widowed | -0.182 | -0.195 | -0.184 | -0.161 | -0.191 | -0.192 |
|  | (0.228) | (0.227) | (0.227) | (0.228) | (0.227) | (0.227) |
| Risk Perception | 0.0355*** | 0.0351*** | 0.0425*** | 0.0379*** | 0.0332*** | 0.0423*** |
|  | (0.00513) | (0.00517) | (0.00767) | (0.00534) | (0.00528) | (0.0103) |
| Official microblogs and public accounts (OMPA)(No=0) |  | 0.189*** | 0.186*** | 0.192*** | 0.192*** | 0.466 |
|  |  | (0.0579) | (0.0579) | (0.0578) | (0.0579) | (0.352) |
| Individual WeChat circles and microblogs(IWM) (No=0) |  | 0.0322 | 0.417 | 0.0359 | 0.0328 | 0.0316 |
|  |  | (0.0459) | (0.301) | (0.0459) | (0.0459) | (0.0459) |
| Online websites(OW) (No=0) |  | 0.143* | 0.145* | 1.249** | 0.138 | 0.145* |
|  |  | (0.0851) | (0.0851) | (0.564) | (0.0851) | (0.0852) |
| Overseas media(OM) (No=0) |  | 0.134 | 0.134 | 0.139 | -1.190 | 0.129 |
|  |  | (0.115) | (0.115) | (0.115) | (0.761) | (0.115) |
| IWM×perception |  |  | -0.0131 |  |  |  |
|  |  |  | (0.0102) |  |  |  |
| OW×perception |  |  |  | -0.0374** |  |  |
|  |  |  |  | (0.0188) |  |  |
| OM×perception |  |  |  |  | 0.0423* |  |
|  |  |  |  |  | (0.0240) |  |
| OMPA×perception |  |  |  |  |  | -0.00931 |
|  |  |  |  |  |  | (0.0117) |
| Constant | -3.587*** | -3.734*** | -3.939*** | -3.804*** | -3.674*** | -3.941*** |
|  | (0.600) | (0.601) | (0.622) | (0.602) | (0.602) | (0.655) |
| N | 1,537 | 1,537 | 1,537 | 1,537 | 1,537 | 1537 |
| R2 | 0.073 | 0.081 | 0.082 | 0.084 | 0.083 | 0.087 |

*** p<0.01, ** p<0.05, * p<0.1
